# Supplementary material for: A novel binary pesticidal protein from Chryseobacterium arthrosphaerae controls western corn rootworm by a different mode of action to existing commercial pesticidal proteins
Source: PLoS One. 2023 Feb 17;18(2):e0267220. doi: 10.1371/journal.pone.0267220 (PMC9937505; doi:10.1371/journal.pone.0267220)
Supplement: S1 Table — (XLSX) [file pone.0267220.s005.xlsx]

## Sheet: S1
CODE SEQ	Component	Family	Origin	Accession N°		CRW ACTIVITY (with the two components)	Organism	Séquence
GDI0005A	1	GDI0005	Lemire Collection	OK428600	Genbank	YES	Chryseobacterium arthrosphaerae	MKKFNTPAYQAEKDFKQYPHLGEQLENAWSNYVKYCTINSIMGNPWSSTYDHPRSWYYNPLVDDVVPTEQNTVPIQWNAFPNRINHYFTGLFTKQFGSAEYEDKLHELADIGPAAFGKKYNMDLTVPKNPCDPSDTRTKPFGPSGPRGWQDEYCEWAVTRDENGDITAVDFTHENPEYWFHMWKISPDIVVALYQEILNNKNVKKEDLYLLDSTGNPVIVRETGEPAYNPINKWNNGPEATPEGGGAVHLTSPPNSLGAEIYLGAAATILRVKNNQVITDANALICAAQYGQIYRNSDPRIGQNVNSLVYNHKQQITLTNPIALYGQVPDFDQFEMPSTAGSYKIQDCYTVVRGEERNKGITFYPFNMLLHTRFSVPKGANFKLSEIKVKGKLLKWGSQ…
GDI0006A	2	GDI0006	Lemire Collection	OK428601	Genbank	YES	Chryseobacterium arthrosphaerae	MKTLVFSLFILSFISCESGKKDQRLNSATGFSKVADSESIYCGAFCDPPSITYKLAGDSTCAHSSQDVLNCFAWKNFIALNWAASAQRGVPDTTATAANYGMPGDYSPTVWESFASNDEVFAPKNLLTWNLKSKNGYVKQINEINKFTDINISIPKATLRAAVGNSNVDEILQAEGSWLTDQSGNIVWYEIKINNIESDFIRRNKLYDYNSLKEYGTANNGVWLPMESIELKAAWRVIPEDKLDSLKNYYKISKAMVPEIKGFKDKKPVFGKSTQKYLGLVGLHIIRKTPQSPQFNWMTFEHIHNAPNEGQADPSVRYCFYNPKSTKTPNIAPVIGKDSLNTPVQVVRVNKIKTKLQKLNTQMQQLIRASNPKSVWQYYQLVNIQWPENPIQDNGNNKS…
GDI0103A	1	GDI0103	Lemire Collection	NA	NA	YES	Burkholderia cenocepacia	MATPLSAFRSPANQAAKDLADYPAALTAFSALWNTYLDGITQQAIVGNPWQASNSSNTPYYFNPLTTAMPGDAVTTGVQWSAMPGRISYYDEAQWGSTLSPTQINQLADYGWTPSSAAANRQTFPNLTTDPCSGEQDSKAYGPYGPRGWQDEYCEWSVLRDPTTNKIVRIDFTCENPEYWYTLWRVAPDVVVDLYRATLDNPAIQPSDLWLKDAAGHAVIDPSTGAPAYDPLNIWNRGPERTATSGGAMHLTSTPNTLQTEIAGLAGAATIQRTCGATDPEVLLCCAQYGQPHRNSDPHIGLVVNQVVGLGNKVTIADPPGLYMQMPNFSQYKLPSSAPAGATAQDYWRVVRGAVSLNDMNGHPLPGNLILHAVFEVPSGLGFTVGDITIGGTPIEYAA…
GDI0104A	2	GDI0104	Lemire Collection	NA	NA	YES	Burkholderia cenocepacia	MMRRARRPFGPAARIAVTLGACVAFAAGIAQAKESPAPAPAGANGHATTSRAATSTYSACFAAPTVSFVLPADAALSDQADMNCFAWQQFIALNWQASATQNGQPDTSVTAQSFGMPSAAAPTVWETYALSSNVFRPNAATPLPFNGASRKAAARAKPGRAPFVRGAAAEDALVDIQQAFTKGWITAQNGMPTFYEKRMNVEEYDYIVDNRLYDANAQWQRIASNTGIQLPDGSASGTVGAIELKAAWLPLTDPSLYARYLTRPATLIDPATGQRTNAVVGLVGLHIIHKTRKAQQFAWATFEQVDNVPVQGQVGAGPYTYYNPHCDPASDPYQCRVNTIPMCADNACDYAKPTQVARVQPIPDDVAALNAYVQGVIRDANPQSVMQYYQLISVMWPSA…
GDI0175A	1	GDI0005	NCBI	A0A1M7LWV3	Uniprot id	YES	Chryseobacterium carnipullorum	MKKFDTPAYQAEKDFKDQPDLKIQIENAWSDYVKYCTINSQMGNPWSSSYDHPRSWYYNPLVTPVTPIKNNTVPIQWGAFPNRINHYFTDLFTQKFGKADATDKLHELADIGPDAFSKKYDITLTVTKNPCDPNNTATKPFGPSGPRGWQDEYCEWAVTRDTNGDIIAVDFTHENPEYWFHMWKVSPDMVVSLYQEILNNSNVKKEDLYLLDEQNNPVIVRETGLPAYNPINKWNNGSSATTAGGGAVHLTSPPNSLGAEIYLGAAATILRAVNGKVITDANALICAAQYGQIYRNSDPRIGQNVNSLVYHNKVKISLTNPIALYGQLPDFTQFTMPASAEGYKIEDCYKIIRGRDINPGTTFYPNNMVLHSRFEVPAGANFKLSEILVQNQPLKWGSQ…
GDI0176A	2	GDI0006	NCBI	A0A1M7LXG4	Uniprot id	YES	Chryseobacterium carnipullorum	MRTLLFSFFLLSLISISCESGKKDKKLNSRLGFSKEMADIDCGAFCDPPTVGYELPADSTCGHSSQSVLNCFAWKNFLALNWRASDERGLPDTTAVAADYGMPGDYSPTVWESYLSADDVFAAKQPEQWNLKSKNGYIKYINEINKFTDINASLPKPKLRAMLGGNVDEIMQAKGAWLTDQSGNIVWYEIRMNSIESDFIRKNKLYSSENLNAFAAKNQGVWLPMESIEIKAAWRVIPENQLESLKNFYKISKAMVPEIKGFDKNNQPIYGKYTQKYLGLVGLHIIRKTNQSPQFTWMTFEHVNNAPTEGQVDPSIKYCFYNPKSTDKPNQSPVPGKDSLSKPVQVIRIANNAITPEIQNLNKQIRDMIKASNPKSVWQYYQLVNVQWPENPIQDGNNN…
GDI0177A	1	GDI0005	NCBI	A0A1N7IC53	Uniprot id	YES	Chryseobacterium shigense	MKKFDTPAYQAEKDFKDQPNLKIQIENAWSNYVKYCTINSQMGNPWSSSYDHPRSWYYNPLVTPVTPIKNNTVPIQWGAFPNRINHYFTDLFTQKFGKADATDKLHELADIGPDAFSKKYDITLTVTKNPCDPDNTATKPFGPSGPRGWQDEYCEWAVTRDTNGGIIAVDFTHENPEYWFHMWKVSQDMVVSLYQQILNNSNVKKEDLYLLDEHHNPVIVRETGLPAYNPINKWNKGSSATAEGGGAVHLTSPPNSLGAEIYLGAAATILRVVNGKVITDANTLICAAQYGQIYRNSDPRIGQNVNSLVYNNKLKISLTNPIALYGQLPDFTQFTMPASAEGYKIEDCYKIIRGTDINPGTTFYPSNMILHSRFEVPAGANFKLSEILVQNQPLKWGSQ…
GDI0178A	2	GDI0006	NCBI	A0A1N7IC47	Uniprot id	YES	Chryseobacterium shigense	MRTLIFSFFLLSLISISCESGKKDKKLNSRLGFSKEMADMDCGAFCDPPTVGYQLPADSICGHSSQSVLNCFAWKNFLALNWKASDERGLPDTTAVAADYGMPGDYSPTVWESYLSADDVFAAKQPEQWNLKSKNGYIKYINEINKFTDVNASLPKPKLRAMLGGNVDEIMQAKGAWLTDQSGNIVWYEIRMNSIESDFIRKNKLYSSENLNAFAAKNQGVWLPMESIEIKAAWRIIPEDQLESLKNFYKISKAMVPEIKGFDKNNQPIYGKYTQKYLGLVGLHIIRKTNQSPQFTWMTFEHVNNAPTEGQVDPSVKYCFYNPKSTDQPNQSPVPGKDSLSKPVQVMRIANNAITPEIQNLNKQIRDMIKASNPKSVWQYYQLVNVQWPENPIQDGNNN…
GDI0179A	1	GDI0005	NCBI	A0A1M5KH65	Uniprot id	YES	Chryseobacterium sp	MKQFDTPAYQADKDFKDQPDLRNQIENAWSNYVKYCTINSQMGNPWSSSYDHPRSWYYNPLVTPVTPNKNNTVPIQWGAFPNRINHYFTSLFTKVFPNEAQDKLHELADIGPKAFTEKYGTQLVVPKNPCDPTNTDTKAFGPSGPRGWQDEYCEWSVTRDTNGDIIAVNFTHENPEYWFHMWKVSQDMVVSLYQEILNNPNVQKEDLYLLDENGNPVIVRETGLPAYNPINKWNNGSSATAEGGGAVHLTSPPNSLGAEIYLGAAATILRVVGGKVITDANTLICAAQYGQIYRNSDPRIGQNVNALVYNKKLKISLTNPIALYGQMPDFTQFAMPDSAEGYTIEDCYKIIRGTATNPGTDFYPFNMILHSRFEVPAGAQFKLSDIKVQGQPLKWGSQI…
GDI0180A	2	GDI0006	NCBI	A0A1M5KHA3	Uniprot id	YES	Chryseobacterium sp	MRTLLFSFFLLSLISISCESGKKDKKLNSRVGFSQKMADFDCGAFCDPPSVTYQLPADSSCVNSSQNVMNCFAWKNFLALNWLASDQRGVPDTAAVAADYGMPGDYKPTVWESYLSIDDVFAAKPPAQWNLRSKNGYMKYINEINKFTDINASLPKPKLRAMLGGNVDEIMQAKGAWLTDQSGNIVWYEIRMNTIESDFVRDNKLYNYGSLSAFAAQNQGVWFPMESIEIKAAWRIIPEDQLESLKNFYKISMAMVPEIKGFDKNNKPIYGKYLQKYLGLVGLHIIRKTNQSPQFTWMTFEHVNNAPTDGQIDPSVKYCFYDPKSKDKPNQSPVPGKDSLNKPVQVVRIADNAISPEIQQLNKQIQNMIKASNPKSVWQYYQLVNVQWPENPVKDKDNN…
GDI0181A	1	GDI0005	NCBI	A0A1M4WXJ6	Uniprot id	YES	Chryseobacterium sp	MNKFNTPAYQAEKDFKDQPDLKNKIENAWSNYVKYCTINSQMGNPWSSSYDHPRSWYYNPLVTPAIPAKNNTVPIQWGAFPNRINHYFSDLFAQKFGKGEAQDKLYELADIGSEAFSKKYAIELTVPKNPCDPNNTAKKPFGPAGPRGWQDEYCEWAVTRDASGDIIAVNFTHENPEYWFHMWKFSPDTVVSLYQQILNNPNVKKEDLYLLDSSNNPVIVRETGLPAYNPINKWNRGSSATETEGGAVHLTSPPNSLGAEIYLGAAATILRVVDGNVITDANTLVCAAQYGQIYRNSDPRIGQNVNSLVYINKLKVSLTNPIALYGQLPDFTQFQMPDSAEGYTIEDCYKIIRGTDINPGTTFYPNNMILHSRFEAPAGARFKLSDILVQGQPLKWGSQ…
GDI0182A	2	GDI0006	NCBI	A0A1M4WXH4	Uniprot id	YES	Chryseobacterium sp	MRTLLFSFFLLSLISISCESGKKDKKLNSRIGFSKELDDYGCGAFCDPPSVGYQLTDDNCLHSDQNSMNCFAWKNFLALNWIASDQRGIPDTTALASDYGMPGDYKPTVWESYLSINDVFTAQQPAQWSLKSKSGYIKYINEINKFTDINVNIPKPKLRAMLGGNVDEIMQAKGAWLTDQSGNIVWYEIRMNNIESDFVRNNKLYNSENLNAFAAKNQGVWLPMESIEIKAAWRVIPENQLESLKDFYKISMAMVPEIKGFDKNNQPIYGKYTQKYLGLVGLHIIRKTSQSPQFTWMTFEHINNAPTEGQVDPSVNYCFYNPKSKDKPNQSPVPGKDSLNKPVQVVRIANNAITPEIQQLNKQIQSMIRASNPKSVWQYYQLVNVQWPENPVQDKDNKN…
GDI0183A	1	GDI0005	NCBI	A0A135WCS1	Uniprot id	YES	Chryseobacterium kwangjuense	MTKFDTPAYQAEKDFKNDPDLKSQIENAWSNYVKYCTINSQMGNPWSSSYDHPRSWYYNPLVTPAEPAKNNTVAVQWGAFPNRINHYFTNLFVEKFGKTDAPDKLHELADIGPDAFSKKYNITLVVSKNPCDPSNTETKPFGPSGPRGWQDEYCEWAVTRDASGDIIAVDFTHENPEYWFHMWKVSPDMVVSLYQQILNNPNVKKEDLYLLDEKGNYVIVRETGLPAYNPINKWNRGSSATAGGGGTVHLTSPPNSLGAEIYLGAAATILRVNSQGRVITDANELICAAQYGQIYRNSDPRIGQNVNSLVYNKKLKISLTNPIALYGQQPDFTQFTMPDSAKGYKIEDCYKVIRGSESNPGTTFYPFNMILHSRFEAPAGAKFKLSDIMVKGSKIKWGS…
GDI0184A	2	GDI0006	NCBI	A0A135WDA8	Uniprot id	YES	Chryseobacterium kwangjuense	MRTLLISFFLLSLIAISCESGKKDKKLNSRVGFSQELADFDCGAFCDPPSVSYQLPVDSTCGHSSQNVLNCFAWKNFLALNWKASDERGLPDTTAVAADYGMPGDYSPTVWESYLSIEDVFSARQPQTWNLKSKNGYIKYINEINKFTDINAALPKPKLRAMLGGNVDEIMQAKGAWLTDQSGNIVWYEIRMNNIESDFVRQNKLYNSDNLNAFAAKNQGVWLPMESIEIKAAWRIIPDSQLESLKNLYKISRAMVPEIKGFDKNNQPIYGKYSPKYLGLVGLHIIRKTNQSPQFTWMTFEHVNNAPTEGQVDPSVKYCFYNPKSKDKPNQSPVPGQDSLNTPVQVVRIADNAISADIQQLNKQIQAMIKKSNPKSVWQYYQLVNVQWPENPIQDTNNN…
GDI0185A	1	GDI0005	NCBI	UPI00068E8DB6	UniRef id	YES	Chryseobacterium sp. OV705	MKTFDTPAYQAEKDFKDNPALREKLHNAWSNYVKYCTVNSIMGNPWSSTYDHPRSWYYNPLVTPSIPNENNTVPIQWNAFPNRINHYFTTLFTDKFGKQDYEDKLHELADIGPIAFGQKYNMKLTVPRNPCDPTDTGTKAFGPSGPRGWQDEYCEWSVTRDESGDIIAVNFTHENPEYWFHMWKISPDTVVSLYQEILNNENVQKEDLYLLDSHGNPVIVRETGLPAYNPINKWNNGPDATSSGGGAVHLTSPPNSLGAEIYLGAAATILRVVNGKVITDANTLICAAQYGQIYRNSDPRIGQNVNSLVYNHNVQVSLTNPIALYGQIPHFDQFEMPATANYKIEDCYTVVRGALKNKGITYYPNNMLLHTRFSVPADANFKLSDILVNKKPLKWGSQI…
GDI0186A	2	GDI0006	NCBI	UPI0006463679	UniRef id	YES	Chryseobacterium sp. OV705	MKALILIWSLAIVSIVSCESSKKDKKLNSATGFSKKVTGETIFCGAYCNPPAISYELAADSTCAHSSQEVLNCFAWKNFIALNWIASAQRGIPDTTATAANYGMPGDYSPTVWESFLSIDDVFAPKPPLAWNLKSKTGYIKRINEINKFTDIISSLPKATLRAAVGSSNVDEIMQAEGAWLTDQNGNIVWYEIRINNLESDFIRQNKLYDYDNLKAFGTKNNGVWLPNESIELKAAWRVIPDDQLDSLKNYYKISKAMVPEIKGFNGKKPIYGKYTQKYLGLVGLHIIRKTPQSPQLNWMTFEHVNNAPGPGPADPSVKYSFYNPNSKDPANQSPVPGKDSLNKPVQVVRVNRISQSVQKLNAQMQQLIRASNPKSVWQYYQLVNIQWPENPVADKDNN…
GDI0187A	1	GDI0005	NCBI	UPI000699324B	UniRef id	YES	Chryseobacterium indologenes	MKKFNTPAYQAEKDFKHEPHLGAQLENAWSNYVQYCTINSIMGNPWSSTYDHPRSWYYNPLVDPVIPTEKNTVAIQWNAFPNRINHYFTNLFTQKFGKDQFDDKLHELADIGPAAFGKKYDMVLTVPKNPCDPSDTGTKPFGPSGPRGWQDEYCEWAVTRDENGDIIAVDFTHENPEYWFHMWKVSPDIVVSLYQEILNNKNVKKEDLYLLDSNGNPVIVRETGEPAYNPINKWNRGPVATPEGGGAVHLTSPPNSLGAEIYLGAAATILRVKDNQVITDANALICAAQYGQIYRNSDPRIGQNVNSLVYNYNQKITLTNPIALYGQVPDFDQFDMPSTAGNYTIEDCYTVVRGEERNNGITFYPFNMLLHTRFSVPEGANFKLSDIKVKGKLLKWGSQ…
GDI0188A	2	GDI0006	NCBI	UPI00063D303E	UniRef id	YES	Chryseobacterium indologenes	MKALICSLFILGLISCESGKKDKKLNSATGFSKEVAGESIYCGAYCDPPSITYKLAGDSTCAHSSQDVLNCFAWKNFIALNWIASAQRGVPDTTATAANYGMPGDYSPTVWESFASNDEVFAAKNPLAWNLKSRNTYVKQINEINKFTDINISIPKATLRAAVGSNNVDEILQAEGSWLTDQSGNIVWYEIKINNIESDFIRKNKLYDYNSLKDYGTANKGVWLPMESIELKAAWRIIPEDKLDSLKNYYKISKAMVPEIIGFKDKKPIFGKSTQKYLGLVGLHIIRKTPQSPQFNWMTFEHVNNAPNEGQADPAVKYCFYNPKSKDTPNIAPKIGYDSLNKPVQVVRVNKIKTKLQKLNAQMQQLIRASNPKSVWQYYQLVNIQWPENPIQDNGNNSA…
PIP-45Aa-1	1	PIP-45	WO2016/114973	WO2016114973_0001	patent Id	Yes	Pseudomonas Brenneri	MSTPFKQFTSPAGQAPKDYNKLGLENQLPQFETDWNNDLTGWTQSAIIGNPWSGLNDAPRSGYYNPLVEGYGPTTPPAITWAPFPNRLWTFFYNNGTAVIPQLGGKAMSLQQVMELTDNGQITINNTLYMLYDPNKQGTLLQLPVTRCPTIDWQGKYKDFSPSGPRGWLDEYCEWSIVRDADGNMRKITFTCENPAYFLAMWRIDPNAVLGLYRDYIDPQVQLEDLYLRYTADCPTGKAGDPVIDPTTGQPAYDTVNKWNAGTACVPGQYGGAMHLTSGPNTLSAEVYLAAAATILRPLASSQNSQALICCAQYGQNYRNSDPHIGFSANSVAVNNRLSLTNPIGLYLQQPTDFSAWKGPQGQDVSQYWKITRGTAKSAANGSDQILQAVFEVPVSAGF…
PIP-45Aa-2	2	PIP-45	WO2016/114973	WO2016114973_0002	patent Id	Yes	Pseudomonas Brenneri	MSRLRLSVLSLLTSVVLSLFAMQAAYASPTSDADACVQQQLVFNPKSGGFLPINNFNATGQSFMNCFGWQLFIALNWPVNPGWPATPALAGEPDMNSTLAQFGVPTASGQPMSVAPVWASYKDANDIFLPGAPAPTGWGVQTLVPSNCSTQGSLRAISVGARKFMTATSESAINARHGFHLSSGTLASIPDPIMEASGGWLTDQSQNLVFFERKVGKAEFDYIVSKGLYDAANQLTVAQNLDNQNPGGLSLPIGEPMRSLPPNPVPQEQLGALEVKAAWRILTGKPELYGRYLTTVAWLKNPATLQCTQQVVGLVGLHIINKTQASPNFIWTTFEQVDNVPEPNQVPPQQTPPDSFAFNNPNCGTGPECTPNVARIQCKQHHPDRDCTEPFPRDQPVQT…
PIP-45Ad-1	1	PIP-45	WO2016/114973	WO2016114973_0007	patent Id	Yes	Pseudomonas PAMC 25886	MSTPFKQFTSPAGQAPKDYNKLGLENQLPQFETDWNNDLTGWTQSAIIGNPWSGLNDAPRSGYYNPLVEGYGPTTPPAITWAPFPNRLWTFFYNNGTAVIPQLGGKAMTLQQVMELTDNGQITLNNTLYTLYDPNKQGTLLQLPVTRCPSIDWQGKYKDFSPSGPRGWLDEYCEWSIVRDPGTQNMRKITFTCENPAYFLAMWRIDPNAVLGLYRDYIDPQVQLEDLYLRYTADCPTGNKGDPVMDPTTGQPAYDTVNKWNAGTACVPGQYGGAMHLTSGPNTLSAEVYLAAAATILRPLSSSQNSQALICCAQYGQNYRNSDPHIGFSANSVAVNNRLSLTNPIGLYLQQPTDFSAWKGPQGQDVSQYWKITRGAAKSAANGSDQILQAVFEVPVSAG…
PIP-45Ad-2	2	PIP-45	WO2016/114973	WO2016114973_0008	patent Id	Yes	Pseudomonas PAMC 25886	MSRLRLSVLSLLASVVLSLFALQSAYATPQSDADACVQQQLVFNPKSGGFLPVNNFNATGQSFMNCFGWQLFIALNWPVNPGWPTTAALAGEPDMNSSLAQFGVPTTAGQPMTVAPVWASYKDANDIFLPGAPVPSGWGVQTLVPSNCSTQGSLKAMSVGARKFMTATSESAINARHGFHLSSGTLATIPDPIMEASGGWLTDQAGQLVFFERKVGKAEFDYIVSKGLYDAANQLKVAQNLDNQNPGGLSLPIGEPMRSLPPTPVPQEQLGALELKAAWRILTGKPELYGRYLTTVAWLKNPATLQCTQQVVGLVGLHIINKTQASPNFIWTTFEQVDNVPEPNQLPPQQTPPDSFAFNNPNCGTGPECTPNVARIQCQQHHPDRDCTEPYPRDQPVQT…
PIP-45Ba-1	1	PIP-45	WO2016/114973	WO2016114973_0013	patent Id	Yes	Pseudomonas Putida	MSTPFKQFTSPAGQAPKDYNKLGLEDQLPQFETDWNNNLTGWTESSIIGNPWSGLNDAPRSGYYNPLVEGFGDVTAPAITWAPFPNRLWTFFYNNGAAVIPQLGGKAMTLDQVMELTDHGQITLDNTLYMLYDPNKQGTVLQLPAKRCPSIDWNGKYTAFSPSGPRGWLDEYCEWSIVRDANGNMRKITFTCENPAYFLTMWRIDPNAVLGLYRDYIDPNVQLEDLYLRYTVDCPTGKAGDPVIDPTTGKPAYDTVNKWNAGTACVPGQYGGAMHLTSGPNTLSAEVYLAAAATILRPVSSSQNAQSLICCAQYGQNYRNSDPHIGFMANTTAVNNRLSLTNPIGLYLQQPTDFSAWKGPQGQDVSQYWRITRGTAKSAANGSDQILQAVFEVPESAGF…
PIP-45Ba-2	2	PIP-45	WO2016/114973	WO2016114973_0014	patent Id	Yes	Pseudomonas Putida	MMSRSRLSPLSLLCGILLCLSTLQPATAATLSDADTCVQQQLVFNPASGGFLPVNNFNATSQAFMNCFGWQLFIALNWPVNPGWPATASLAGEPDMQSTLAQFGVPSAPGQPMSVAPVWASYKDANDIFLPGAPTPTGWGVQTLVPSGCSTQGSLKALKVGARKFMNATSEGAINALHGFHLSTGTLASIPDPVMEASGGWLTDQAGKLVFFERKVGKAEFDYIVDKGLYDAANQLKVAQNLDGQTPEGLSLPIGEPMRSLPTSPVPQEQLGAIELKAAWRVLTGKPELFGRYLTTVAWLKRPDTLECTQEVVGLVGLHIINKTQASPNFIWTTFEQVDNVPEPAQVPPQQTPPNGFAFNNPDCGDGPECTPNQARIQCKQTHPDKDCTDLFPRDQPVQ…
PIP-45Bd-1	1	PIP-45	WO2016/114973	WO2016114973_0019	patent Id	Yes	Pseudomonas montelli	MSTPFKQFTSPAGQAPKDYNKLGLEDQLPQFETDWNNNLTGWTQSSIIGNPWSGLNDAPRSGYYNPLVEGFGDVTPPAITWAPFPNRLWTFFYNNGAAVIPQLGGKAMTLDQVMELADHGQITLDNTLYTLYDPNKKGTVLQLPVKRCPSIAWNGTYKDFTPSGPRGWLDEYCEWSIVRDANGNMRKITFTCENPAYFLAMWRIDPNAVLGLYREYIDPSVQLEDLYLRYAEDCPTGKAGDPVMDPTTGKPAYDTVNKWNAGTACVPGQYGGAMHLTSGPNTLSAEVYLAAAATILRPVSSSQNAQSLICCAQYGQNYRNSDPHIGFMANTTAVNNRLSLTNPIGLYLQQPTDFSAWKGPQGQDVSQYWRITRGTAKSAANGSDQILQAVFEVPESAGF…
PIP-45Bd-2	2	PIP-45	WO2016/114973	WO2016114973_0020	patent Id	Yes	Pseudomonas montelli	MSRSRLSLLSLLCGILLCLSTPQPAMAATLSDADACVQQQLVFNPASGGFLPVNNFNATSQAFMNCFGWQLFIALNWPVNPGWPATASLAGEPDMNSTLAQFGVPSAPGQPMSVAPVWASYKDANDIFLPGAPTPTGWGVQTLVPSGCSTQGSLKSLKVGARKFMNATSEGAINALHRFHLSTGTLASIPDPVMEASGGWLTDQSGNLVFFERKVGKAEFDYIVDKGLYDAANQLKVAQNQDGKTPEGLSLPIGEPMRSLPPSPVPQEQLGAIELKAAWRVLTGKPELFGRYLTTVAWLKRPDTLNCTQEVVGLVGLHIINKTQASPNFIWTTFEQVDNVPEPAQAPPQQTPPNGFAFNNPDCGSGPECTPNQARIQCKQHHPDKQCTDLFPRDQPVQT…
PIP-45Be-1	1	PIP-45	WO2016/114973	WO2016114973_0021	patent Id	Yes	Pseudomonas montelli	MSTPFKQFTSPAGQAPKDYNKLGLEDQLPQFETDWNNDITGWTEAAIIGNPWSGLYDAPRSAYYNPLVEGYGDTTLPAITWQPFPNRLWTFFYNNGTAVIPQLGNKAMTLQQVMELTDNGQITINGTLYTLYDPDKKGTLLQLPVTRCPTIDWNGKYKDFSPSGPRGWLDEYCEWSIVRDTNGNMRKITFTSENPAYFLAMWRIDPNAVLGLYRDYIDPNVQLQDLYLRYTADCKTGKAGDPVIDPTTGLPAYDTVNKWNSGTACTPGQFGGAMHLTSGPNTLSAEVYLAAAATIMRPLKSSQSAQALICCAQYGQNYRNSDPHIGFAANGATNDGATPSRISLTNPIALYLQQPTNFNAWKGPQGQDVSQYWRITRGTAKSAINGSDQILQAVFEVPE…
PIP-45Be-2	2	PIP-45	WO2016/114973	WO2016114973_0022	patent Id	Yes	Pseudomonas montelli	MYRFRLRGLLLVGTLLSLFLLPTAQASDADTCVQQQLVFDPNSGGFLPVNNFNTTGQSFMNCFGWQLFIALNWPVDPGWPANAALAGEPNRKISMAQFGVPQVAGQPMTTAPVWASFKDANDIFLPGARPPTGWGVQTLVPSNCSSEGSLKALSVGARKFMNATSESATNAKHRFHLSSGTLASIPDPIMEAAGGWLTDQTGNLVYFERKVGKAEFDYIVKYGLYDAANQMVVAQNSDGNHPAGLSLPAGELMRSMPAQPLPQEQLGALELKAAWRILTGKPQLYGRYLTTVAWLKNPATLQCTQQVVGLVGLHIINKTQSSPNFIWTTFEQVDNVQEPGQVPAQQTPPDGFTFYNPNCTGGPDVCTPNVARIQCQQHHPDRECTEPYPRNQPVQTTRE…
PIP-45Ca-1	1	PIP-45	WO2016/114973	WO2016114973_0035	patent Id	Yes	Pseudomonas Putida	MSTPFTQFTSPAEQAPKDYNKLGLEDQLPAFETDWNNNVTGWTQMSIIGNPWSNLNDAPRSGYYNPLESGYGTLTPKTITWQPFPNRLWTFFYNEGAAVVPQLGGKAMTLDQVMQLTDHGQITLNDTLYSLYPDPKATQLQIPSVLCKSINWNGPYADFSPSGPRGWLDEYCEWSITRDPDGNMRSIMFTSENPAYFLTMWNIDPGAVLGLYQAYVDPQVKLEDLYLRYTADGPTGKAGEPVLDPTTGQPAYDTVNKWNSGTVRIPGVSGGAMHLTSGPNTLSAEIYLAAAATILRPLTSSQNQQSLICCAQYGQNYRNSDPHIGFSANQAAVNNLISLTNPIGLYLQQPKSFSTWKGPQGQDVSSYWRVTRGTAGTGPNNSDQILQAVFEVPASAGFS…
PIP-45Ca-2	2	PIP-45	WO2016/114973	WO2016114973_0036	patent Id	Yes	Pseudomonas Putida	MNGWLRPLRRARLRIACAITCTLLPLLAATPANAASDAQSCVSQLVFDPTSGGFLPVNNFGTEQAFLNCFGWQLFIAMNWPVNPGWPANPSLAGEPDTQSSAAQFGVPPTPGQPMSNAPVWASYKDASEIFLPGAAKPSGWGVETLVPSNCTATGNLKAFATGARKFITATSESAINRKHRFHLSSGTQVTLPDSIMEASGGWLTDQSGNLVFFERKVGKAEFDYIVDNGLYDAANQLIVAQNSDNRHPAGLSLPAGKPVRELPAKALPQEELGALELKAAWRVLTNKPDLYGRYLTTVAWLQRPDTLQCTQEVIGLVGLHIINKTQTQPNFIWTTFEQIDNVPDGGAAPPQGYSFNNPECTGDACAPNVARVQCDATHTPPDCTPLDQPVQATRLNAT…
PIP-45Cb-1	1	PIP-45	WO2016/114973	WO2016114973_0037	patent Id	Yes	Moutain Pine Beetle microbial communities	MSTPFTQFTSPAEQAPKDYNKLGLENQLPTFETNWNNNVTGWTQMSVIGNPWSNLNDAPRSGYYNPLESGYGTQTPVTITWQPFPNRLWTFFYNNGAAVVPQLGGKAMTLDQVMQLTDHGQITLNNTLYSLYPDPKATQLQIPSVLCKSINWNGPYADFSPSGPRGWLDEYCEWSITRDPDGNMRSIMFTSENPAYFLTMWNIDPQAVLGLYKAYVDPQVKIEDLYLRYTANGPTGQAGEPVLDPTTGQPAYDTVNKWNSGTVRIPGVSGGAMHLTSGPNTLSAEIYLAAAATILRPLNSSRNQQSLICCAQYGQNYRNSDPHIGFSANQAAVNNLISLTNPIGLYLQQPKSFSTWKGPQGQDVSSYWRVTRGTAGTGPNNSDQILQAVFEVPQSAGFS…
PIP-45Cb-2	2	PIP-45	WO2016/114973	WO2016114973_0038	patent Id	Yes	Moutain Pine Beetle microbial communities	MNGWLRPLRRARLRVFCWITCALLPLLAPSPANAATDAQSCVSQLVFDPTSGGFLPVNNFGTEQDFLNCFGWQLFIAMNWPVNPGWPANASLAGEPDTQSSVAQFGVPATPGQPMSNAPVWASYKDASEIFLPGAPKPSGWGLETLVPSNCTASGNLKAYATGARKFITATSESAINRKHRFHLSSGTQVTLPDSIMEASGGWLTDQSGNLVFFERKVGKAEFDYIVDNGLYDAANQLIVAQNSDNRHPAGLSLPAGKLVRELPAQALPQEELGALELKAAWRVLTNKPELYGRYLTTVAWLQRPDTLQCTQEVVGLVGLHIINKTQTQPNFIWTTFEQVDNVPDAGPTPPQGYSFNNPACSGTACTPNVARVQCDATHAPPNCTPLDQPVQATRVNAT…
PIP-45Ea-1	1	PIP-45	WO2016/114973	WO2016114973_0049	patent Id	Yes	Paracoccus dentrificans PD1222	MTIFTEFSTPAQQGPKDYQLLGLPAADLAAFEADWSANIAGWTQMSIIGNPWSNLNDTPRDNYYDPLVEGMGEATAAVISWPPFPNRLIQFLTNPGIVKGGQLTAPLSQDAVQELADSGRITQGGTSFVLFDPEPGQVLLKIPADRCPAIDWDGKYVDFSPSGPRGWQDEYCEWSILRNAQGKMQSIAFTCENPAYYLTMWRQNPKAVLGIYQRYIDPAVQLEDLFLRYEYDQPTGKKGDPVLDPTTGNPAYDPTNKWNRGPARVPGSFGGAMHLTSPPNTLSAEIYLAAAATIQRPSSVNGNPQSLICCAQYGQNFRNSDPNIGYGANVAARTARLTLTDPVGLYIQQPQNFQGWSGPNGEDVSGYWQILRGTAGTGPNGSDQILHAVFAIPESAGYS…
PIP-45Ea-2	2	PIP-45	WO2016/114973	WO2016114973_0050	patent Id	Yes	Paracoccus dentrificans PD1222	MRTGQILIALVAGVMLAFAASGGKAQTACSAMLITDPTSADFLTGDTPFGHTQDGMNCYGWQMFLSLNWPADPGWPQTPAMAGEPDRSATIADFGLPGPAGQPMQRPTVWQSFMPAPEIFKPFAAMPTGWGETSPPPASCGSASLAASAGSIRMLNAVSKSAVSPRHGFNLDTGTMSSISDEIEEATGGWLTDQKGKLVFFERMIGKAEYDYIVAKGLYDAANQLKVATNADGATPEGLSLPKGTPPGSAVQNQDELGAFELKAAWRNLTGLDDLYGRYLTSTVYLLYPDGSCEKAVVGLVGLHIIHKTASMPDFVWSTFEQIDNVPGASAPEVDFSFNNPASNAKPNQMPHCVNGVCDYSLPIQVTREVAIPAGVAQTNRDVQQLLADRTGGKSVFQY…
PIP-45Ga-1	1	PIP-45	WO2016/114973	WO2016114973_0051	patent Id	NO	Cellvirio japonicus Ueda107	MSAFTFSTPALIQDFSDNPSLQQQLNQNWDLAIDAYTQAALVSNPWTVDYQAPCDWYVNPKQADITAANPVEPIFWTAFPNRLKIYFSAAEKSPYQMANAQVFALADFGNVPQSKAFPTGLPFIIPSKRCPNLNWQQSIAEWVQYDPKGPRGWLDEYCEWSVTRNADGKITKIAFTCENPEYWFTLWQVSPEKVLALYQQLVSPNVVLEDLQLPSADGKGFVIDPTTGRPAYNPLNKWNSGTVATETYGGAVHLTSPPNTIGAEIMLAAQATLLRDLPPDQYNMQRMVCAGAYGRAYRNSDPHIGLQANQLVKNLGVKITLTNPVGLYLQRPDFSSYKTPDGKDAGQFYKVIRGRTAQQAGTTYDQILHAEFSVPEELGYTVSDILIGNAVPGSSQVPV…
PIP-45Ga-2	2	PIP-45	WO2016/114973	WO2016114973_0052	patent Id	NO	Cellvirio japonicus Ueda107	MKHTLLIGVTTGLLVAACQQPVQESSAAVDAPAVSTVSSSSAPISFPCLNKPAVNYNTPGDTPITSQDGVNCFAWQTFIGLNWPVDASHPGEPDKTASASVFGEPGLHQTSVWETYANSKSVFRANAQPPLPWGHTPDVPSSCQKISQTLGLRVMQASRMPGSFNMSKEASQAFPGNNPNWLADKSGNLVYYEILIGKDEYDYINNNGLYNANTQAAHIQQNKNIAMPLGHDKVLGGLEIKAAWLSVSDPQNPKWKNYKLSTSVIYDPVSKDCHASTIALVGMHIIRKTASQPQWIWATFEHKDNAPDTASIKSDGTVDGDYTFYSNSCTVKPVPAGCKAKVENGTSVTQTSCHVNVSPAYYLDTSGNCPAYPIQVSRDFAIKDSTDNHVASLNRAVQQ…
PIP-74Aa-1	1	PIP-74	WO2016/114973	WO2016114973_0073	patent Id	YES	Pseudomonas Rhodesiae	MAKLTQFSTPADIQDFSDSPAQQERMNAAWSGNINRWVNAALVGDVWDLINYGPRPAFYNPLDTDTPSTSVNAPITWNAFPGRIPALFPNQSANWLQWADQGVPANVTTNLCTQQSVPPAPYSPTGPRGWQDEYCEWSVTRNAAGQITSVMFTCENPEYWMTLWQVDPGKVLQRYQQLINPAVQLADLSLKDAQGQTVIDPVTGAPCYNPLNKWNSGTQTLPGSGGAMHLTSSPNTLGAEYDLAAAATMPRELNNEPVTSASQLVCYARYGRIGRHSDPTIGQNVNQYVNYTSGLTEVRATLTNPPGLYIQTPDFSGYTTPDGSPAAACWTINRGHLAQTSDDIDRILHATFSVPAGKNFTVSDISINGAKIQYASQIAGTITMGLMATVFGNSGVTQQ…
PIP-74Aa-2	2	PIP-74	WO2016/114973	WO2016114973_0074	patent Id	YES	Pseudomonas Rhodesiae	MRRRPTVLLGLALLLGLPATQAMGAPLCGSPFVPSPTLQPTLAPPNFSASDSAVDCFMWQTMVYLNWPATPGQRGVPNAAASLGSPGPSVWQTYKDYNELYLPNGQQPPAWNDNFLSVQRLQTRGVARALPSIRLLNSTSKVFRAANANESPALREIEQVGGGVLYDQAGSPVYYEMLVNEVNFDFIYNNQLYNPAQQNLYAKQKGIVLPNNSIEIKAAWKVLSDPDNPQRFLTAQALLPGSSTPVTVGLVGLHVFQMPSSAFNQGFWATFQQLDNAPTVAGATPGAHYSFNNPQCAPAQCPPNDKTSNPTQVVQNFPPTPEAQNINHYMQNLIAQQAPGSALQYYQLVDVQWPTSPQAIGQPGATAPAPSGTPNHDTLINPVLETFLQANHKSCLGCH…
Cry34Ab1 (Gpp34Ab1)	1	Cry34	NCBI or Patent (Wyatt)	AAG41671	Genpept - Translated Genbank	YES	Bacillus thuringensis	MSAREVHIDVNNKTGHTLQLEDKTKLDGGRWRTSPTNVANDQIKTFVAESNGFMTGTEGTIYYSINGEAEISLYFDNPFAGSNKYDGHSNKSQYEIITQGGSGNQSHVTYTIQTTSSRYGHKS
Cry35Ab1 (Tpp35Ab1)	2	Cry35	NCBI or Patent (Wyatt)	AAG41672	Genpept - Translated Genbank	YES	Bacillus thuringensis	MLDTNKVYEISNHANGLYAATYLSLDDSGVSLMNKNDDDIDDYNLKWFLFPIDDDQYIITSYAANNCKVWNVNNDKINVSTYSSTNSIQKWQIKANGSSYVIQSDNGKVLTAGTGQALGLIRLTDESSNNPNQQWNLTSVQTIQLPQKPIIDTKLKDYPKYSPTGNIDNGTSPQLMGWTLVPCIMVNDPNIDKNTQIKTTPYYILKKYQYWQRAVGSNVALRPHEKKSYTYEWGTEIDQKTTIINTLGFQINIDSGMKFDIPEVGGGTDEIKTQLNEELKIEYSHETKIMEKYQEQSEIDNPTDQSMNSIGFLTITSLELYRYNGSEIRIMQIQTSDNDTYNVTSYPNHQQALLLLTNHSYEEVEEITNIPKSTLKKLKKYYF
