# Supplementary material for: A novel binary pesticidal protein from Chryseobacterium arthrosphaerae controls western corn rootworm by a different mode of action to existing commercial pesticidal proteins
Source: PLoS One. 2023 Feb 17;18(2):e0267220. doi: 10.1371/journal.pone.0267220 (PMC9937505; doi:10.1371/journal.pone.0267220)
Supplement: S3 Table — (XLSX) [file pone.0267220.s007.xlsx]

## Sheet: Feuil1
Name	Abr	Latin Name	Characteristics	Provider
Western Corn Root Worm	WCR	Diabrotica virgifera virgifera (LeConte)	US non-diapause susceptible strains	Crop Characteristics Inc., Armington, MN
Western Corn Root Worm	WCR	Diabrotica virgifera virgifera (LeConte)	Cry34Bb1/Cry35Bb1 resistant strains	USDA ARS Plant Genetics Research Unit, Columbia, MO
Western Corn Root Worm	WCR	Diabrotica virgifera virgifera (LeConte)	Cry3Bb1 resistant strains	USDA ARS Plant Genetics Research Unit, Columbia, MO
European Corn Borer	ECB	Ostrinia nubilalis (Hubner) European corn borer	Non-diapause susceptible strains	INRAe ECB (Unité Expérimentale d’Entomologie, Le Magneraud, Surgères, France) and Bioline France (Paris, France).
Fall ArmyWorm	FAW	Spodoptera frugiperda (J.E. Smith)	Susceptible strain	Benzon Research, Carlisle, PA
Southern Western Corn Borer	SWCB	Diatraea grandiosella (Dyar)	Susceptible strain	Benzon Research, Carlisle, PA
Corn Ear Worm	CEW	Helicoverpa zea (Boddie)	Susceptible strain	Benzon Research, Carlisle, PA
